# Supplementary material
Source: PubMed Central journal article supplement (PMC4808775)
Supplement: 10.1194_M066530_jlr.M066530-1.pdf [file 10.1194_M066530_jlr.M066530-1.pdf]

# **Major role of adipocyte prostaglandin E<sub>2</sub> in lipolysis-induced macrophage recruitment**

Xiaoqian Hu, Vincenza Cifarelli, Shishuo Sun, Ondrej Kuda,

Nada A. Abumrad, and Xiong Su

## **Supplement**

**Supplementary Figure S1.** Regulation of adipocyte cPLA<sub>2</sub> $\gamma$  and adPLA mRNA levels by forskolin.

**Supplementary Figure S2.** Isoproterenol enhances phosphorylation of cPLA<sub>2</sub> $\alpha$  and ERK in adipocytes.

**Supplementary Table S1.** Primers used for real-time qPCR analysis.

**Supplementary Table S2.** FFA concentrations in adipocyte conditioned media.

**Supplementary Figure S1.** Regulation of cPLA<sub>2</sub> $\gamma$  and adPLA mRNA levels in adipocytes by forskolin. mRNA samples of vehicle (DMSO) or forskolin (FSK) treated adipocytes were prepared and analyzed by RT-PCR. Data shown are averages of triplicates from two separate experiments. \*\* $P < 0.01$ , \*\*\* $P < 0.001$ .

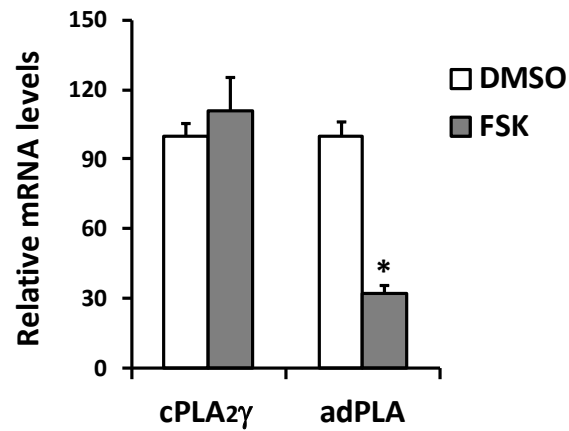

**Supplementary Figure S2.** Isoproterenol enhances phosphorylation of cPLA<sub>2</sub> $\alpha$  and ERK in adipocytes. Whole-cell lysates of adipocytes pretreated with vehicle (DMSO) or isoproterenol (ISO) for 30 min were prepared and analyzed by Western blot for phospho-cPLA<sub>2</sub> $\alpha$  (S505) (p-cPLA<sub>2</sub> $\alpha$ ), phospho-ERK1/2 (T202, Y204) (p-ERK), total ERK1/2 (t-ERK) and Ran. Protein levels were quantified using Li-Cor technology. Data are from two experiments conducted in triplicates. p-cPLA<sub>2</sub> $\alpha$  adjusted to the control Ran and p-ERK to t-ERK are presented relative to vehicle treated cells and are plotted as means  $\pm$  SE. \* $P$  < 0.05, \*\* $P$  < 0.01.

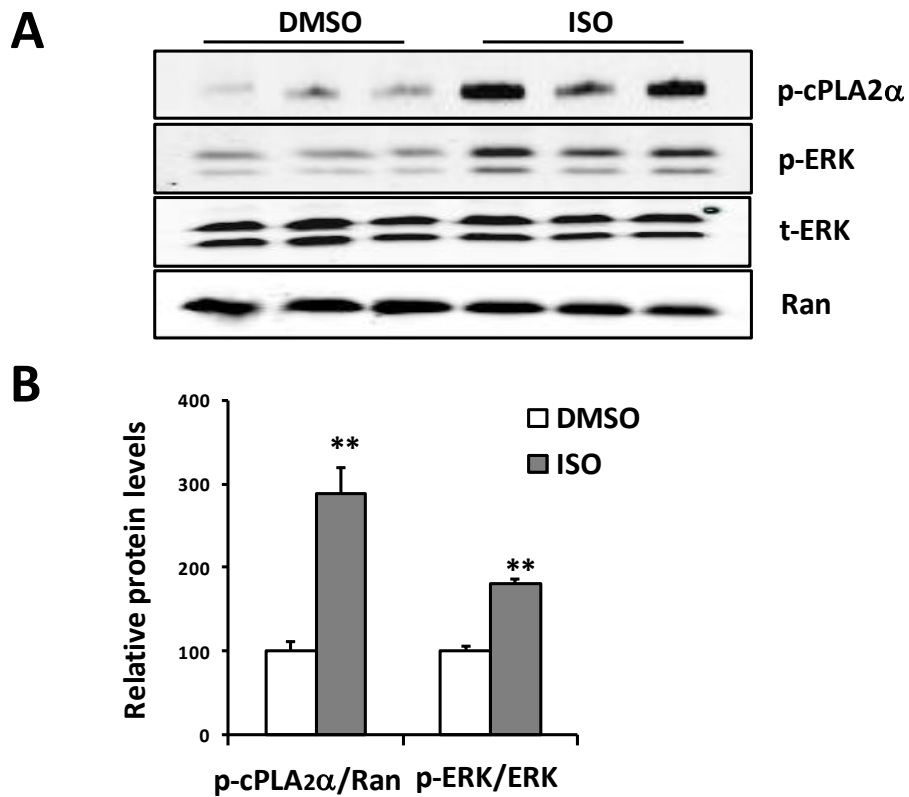

**Supplementary Table S1. Primers used for real-time qPCR analysis.**

| Gene                     | Forward primer (5' - 3')              | Reverse primer (5' - 3')              |
|--------------------------|---------------------------------------|---------------------------------------|
| <i>cPLA<sub>2</sub>α</i> | CCT TTG AGT TCA TTT TGG ATC<br>CTA A  | TGT AGC TGT GCC TAG GGT TTC<br>AT     |
| <i>cPLA<sub>2</sub>γ</i> | GCT GAA AGA ACT TGG CCT<br>GTT G      | CAG CTC CTC TTC TAT CCC TTC<br>CA     |
| <i>adPLA</i>             | ACT CTG CGG CCA TTA AAC CA            | AGG CTT GGG TTC TGG TAT GG            |
| <i>COX1</i>              | AGG TTG GTT CCT CGA ATG TG            | CCT TCT CCT TCT CCT TCA GC            |
| <i>COX2</i>              | CTC ACG AAG GAA CTC AGC<br>ACT        | TAG AAT CCA GTC CGG GTA CAG T         |
| <i>F4/80</i>             | CCT GAT GGT GAG AAA CCT GA            | CCC CAG GAA ACT CCA GAT AA            |
| <i>CD11b</i>             | CAT GGC TTC AAT CTG GAC AC            | TGC TGT AGT CAC ACT GGT AGA<br>GG     |
| <i>36B4</i>              | GCA GAC AAC GTG GGC TCC<br>AAG CAG AT | GGT CCT CCT TGG TGA ACA CGA<br>AGC CC |

**Supplementary Table S2.** FFA concentrations in adipocyte conditioned media. Data are means of triplicates from three separate experiments and presented as μM.

| FFA            | C14:0 | C15:0 | C16:0 | C16:1 | C17:1 | C17:0 | C18:1 | C18:2 | C20:4 |
|----------------|-------|-------|-------|-------|-------|-------|-------|-------|-------|
| <b>DMSO-CM</b> | 2.0   | -     | 4.8   | 4.3   | -     | -     | 1.6   | 3.6   | 1.4   |
| <b>FSK-CM</b>  | 2.6   | 2.0   | 31.1  | 18.8  | 4.3   | 1.6   | 20.3  | 7.1   | 3.5   |
